# Supplementary material for: Isoindigo-based small molecules for high-performance solution-processed organic photovoltaic devices: the electron donating effect of the donor group on photo-physical properties and device performance
Source: Royal Society of Chemistry journal article supplement (doi:10.1039/c3cp52151f), 2013-01-01
Supplement: c3cp52151f.pdf [file c3cp52151f.pdf]

## Supporting Information for

# Isoindigo-Based Small Molecules for Solution-Processed Organic Photovoltaic Devices: Electron Donating Effect of Donor Group on Photo-Physical Properties and Device Performance

Walaa Elsayw<sup>1,2,7</sup>, Chang-Lyoul Lee<sup>3,\*</sup>, Shinuk Cho<sup>4</sup>, Seung-Hwan Oh<sup>5</sup>, Seung-Hyeon Moon,<sup>6</sup> Ahmed Elbarbary<sup>7</sup> and Jae-Suk Lee<sup>1,2,\*</sup>

<sup>1</sup>Department of Nanobio Materials and Electronics and School of Material Science and Engineering, <sup>2</sup>Research Institute for Solar and Sustainable Energies (RISE), <sup>3</sup>Advanced Photonics Research Institute (APRI), <sup>6</sup>School of Environmental Science and Engineering, Gwangju Institute of Science and Technology (GIST), Gwangju 500-712, Republic of Korea

<sup>4</sup>Departments of Physics and EHSRC, University of Ulsan, Ulsan 680-749, Republic of Korea

<sup>5</sup>Radiation Research Division for Industry & Environment, Korea Atomic Energy Research Institute (KAERI), 580-185, Republic of Korea

<sup>7</sup> Department of Chemistry, Faculty of Science, Tanta University, Tanta 31527, Egypt

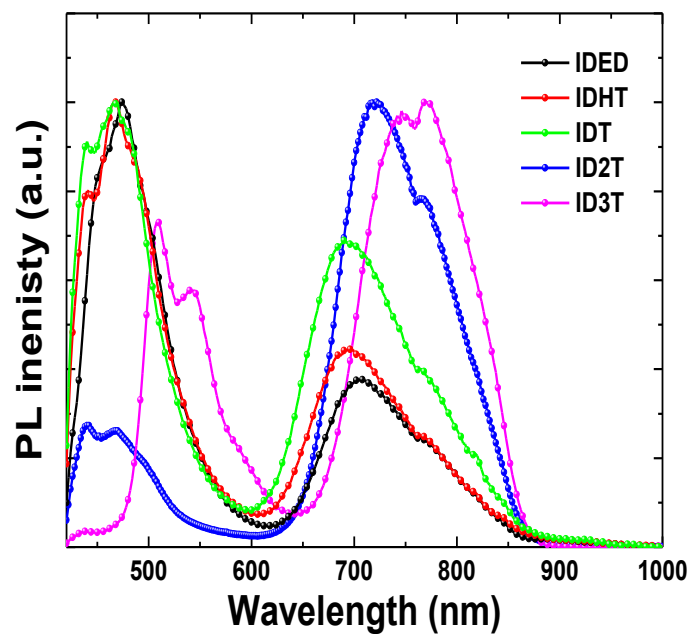

**Fig. S1** PL spectra of isoindigo donor-acceptor-donor (D-A-D) small molecules in solution state. The chloroform was used as solvent. The solution concentration was  $10^{-5}$  mol.

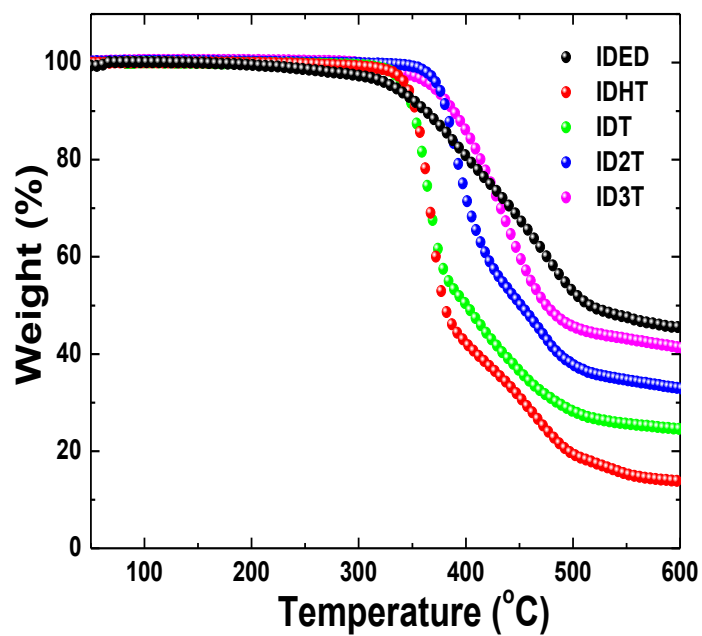

**Fig. S2** Thermo Gravimetric Analysis (TGA) curves of isoindigo donor-acceptor-donor (D-A-D) small molecules.

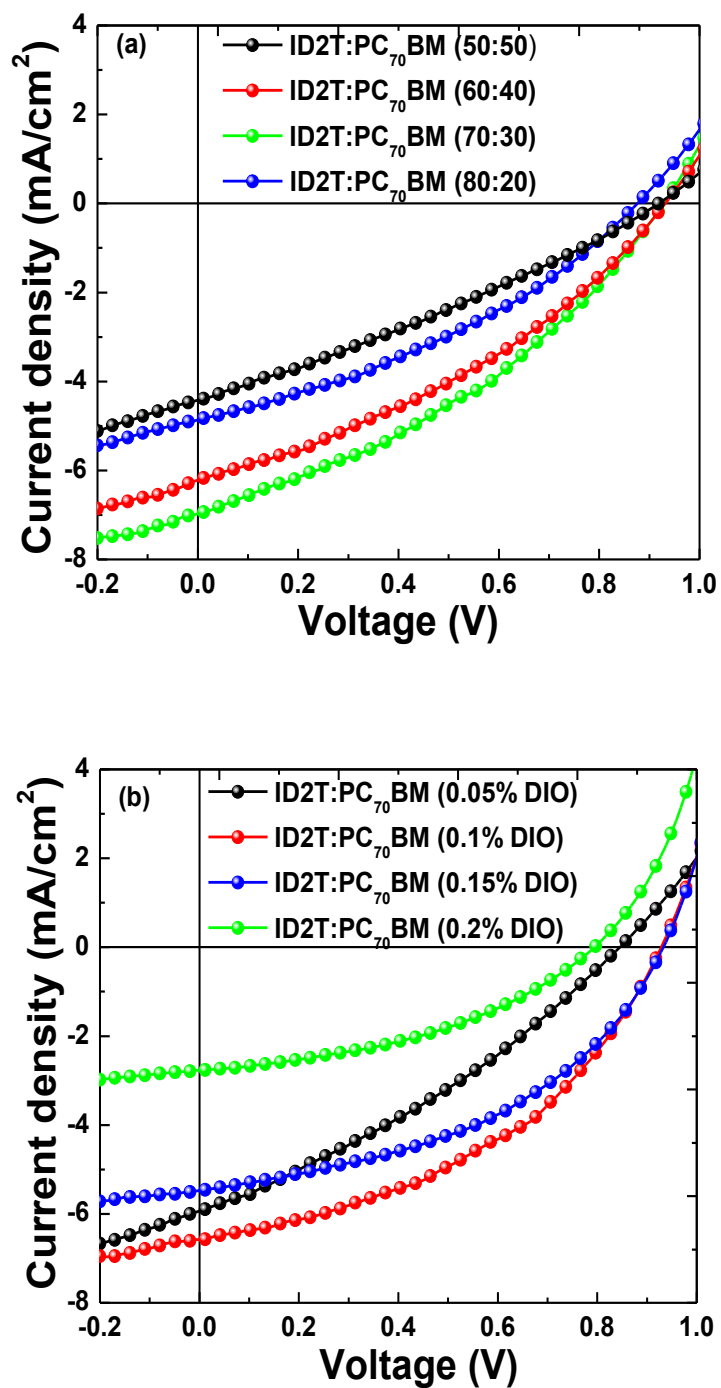

**Fig. S3** (a) Current density versus voltage characteristics of ITO/PEDOT:PSS/ID2T:PC<sub>70</sub>BM/TiO<sub>2</sub>/Al organic photovoltaic devices with different donor and acceptor ratio without DIO. (b) Current density versus voltage characteristics of ITO/PEDOT:PSS/ID2T:PC<sub>70</sub>BM(70:30)/TiO<sub>2</sub>/Al organic photovoltaic devices with different DIO content.

**Table S1** Photovoltaic performance of ITO/PEDOT:PSS/ID2T:PC<sub>70</sub>BM/TiO<sub>2</sub>/Al organic photovoltaic devices with different donor and acceptor ratio (without DIO) and DIO content. The ID2T and PC<sub>70</sub>BM ratio was fixed with 70:30 in photovoltaic devices with different DIO content.

| <b>Donor : acceptor ratio</b> | <b><math>J_{sc}</math>(mA/cm<sup>2</sup>)</b> | <b><math>V_{oc}</math>(V)</b> | <b>FF (%)</b> | <b>PCE (%)</b> |
|-------------------------------|-----------------------------------------------|-------------------------------|---------------|----------------|
| 50:50                         | 4.42                                          | 0.92                          | 29.1          | 1.19           |
| 60:40                         | 6.12                                          | 0.93                          | 35.4          | 2.04           |
| 70:30                         | 7.0                                           | 0.93                          | 36.3          | 2.30           |
| 80:20                         | 4.86                                          | 0.88                          | 34.8          | 1.49           |
| <b>DIO content (%)</b>        |                                               |                               |               |                |
| 0.05                          | 5.93                                          | 0.85                          | 31.7          | 1.59           |
| 0.1                           | 6.58                                          | 0.93                          | 42.8          | 2.60           |
| 0.15                          | 5.48                                          | 0.93                          | 44.6          | 2.26           |
| 0.2                           | 2.77                                          | 0.80                          | 40.9          | 0.90           |

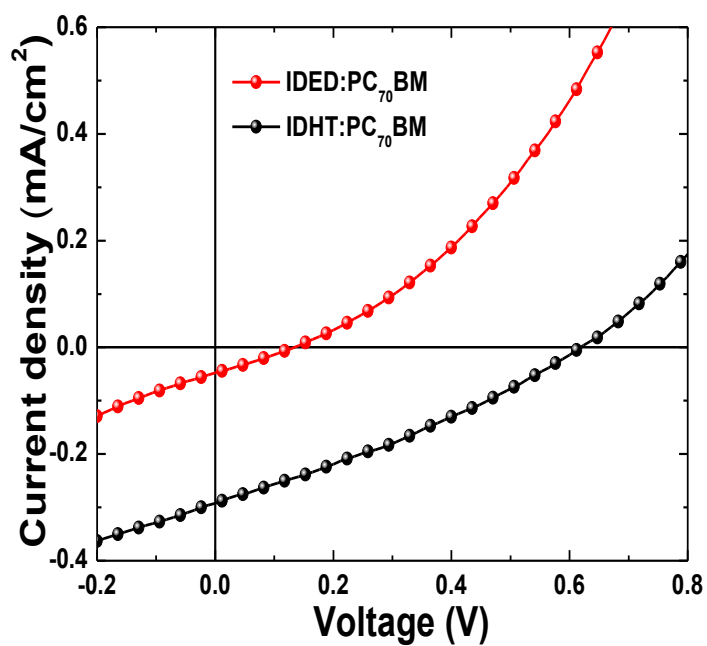

**Fig. S4** (a) Current density versus voltage characteristics of ITO/PEDOT:PSS/IDHT:PC<sub>70</sub>BM (70:30)/TiO<sub>2</sub>/Al and ITO/PEDOT:PSS/IDED:PC<sub>70</sub>BM (70:30)/TiO<sub>2</sub>/Al organic photovoltaic devices with 0.1% DIO.

**Fig. S5** Output and transfer characteristics of OTFTs based on the isoindigo donor-acceptor (D-A-D) small molecules. (a) IDED, (b) IDHT, (c) IDT, (d) ID2T and (e) ID3T.

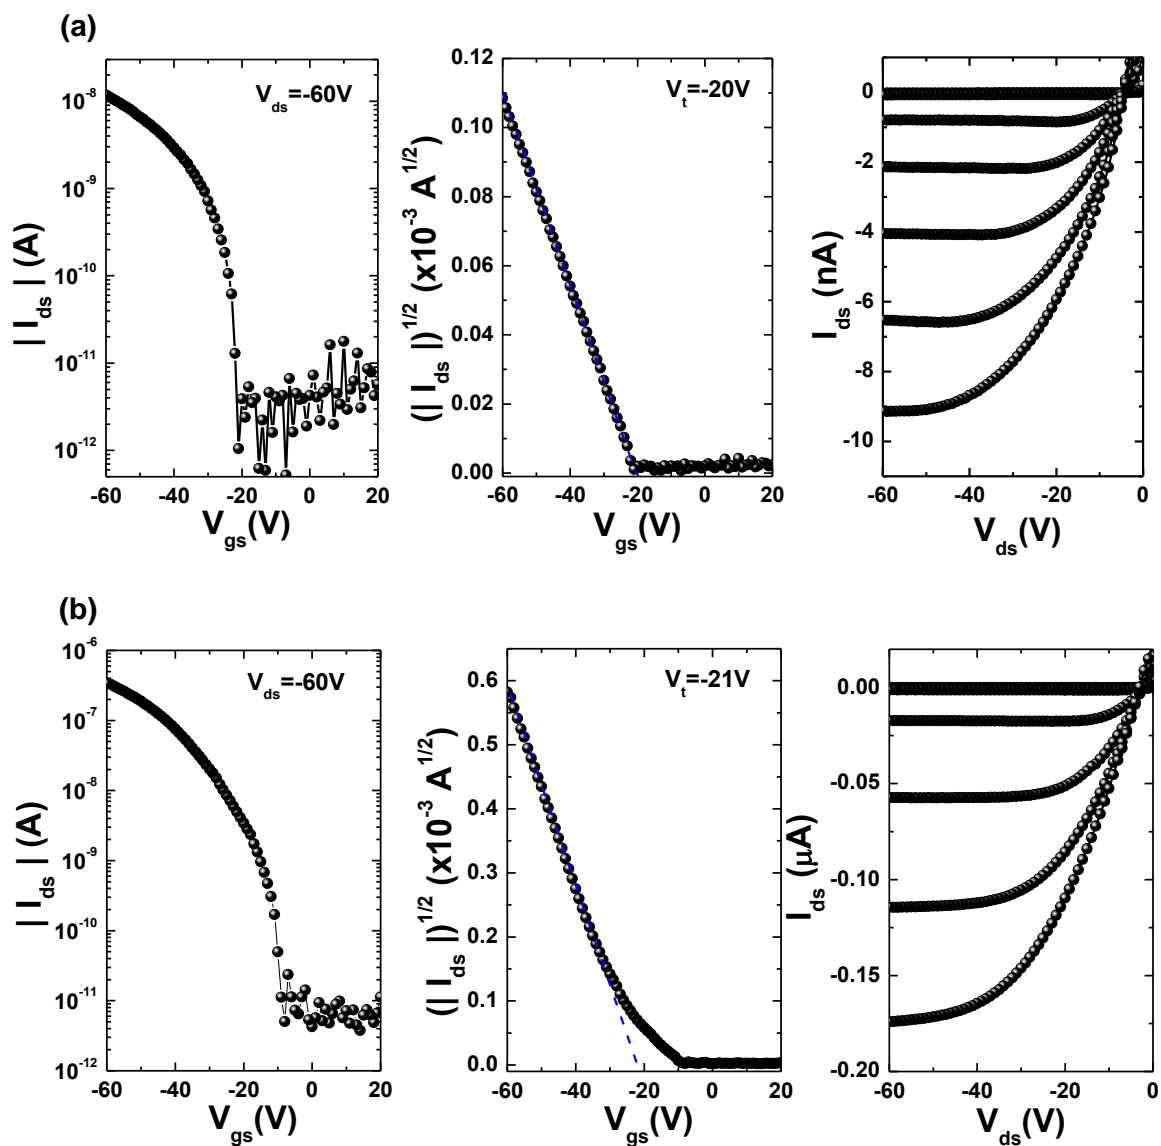

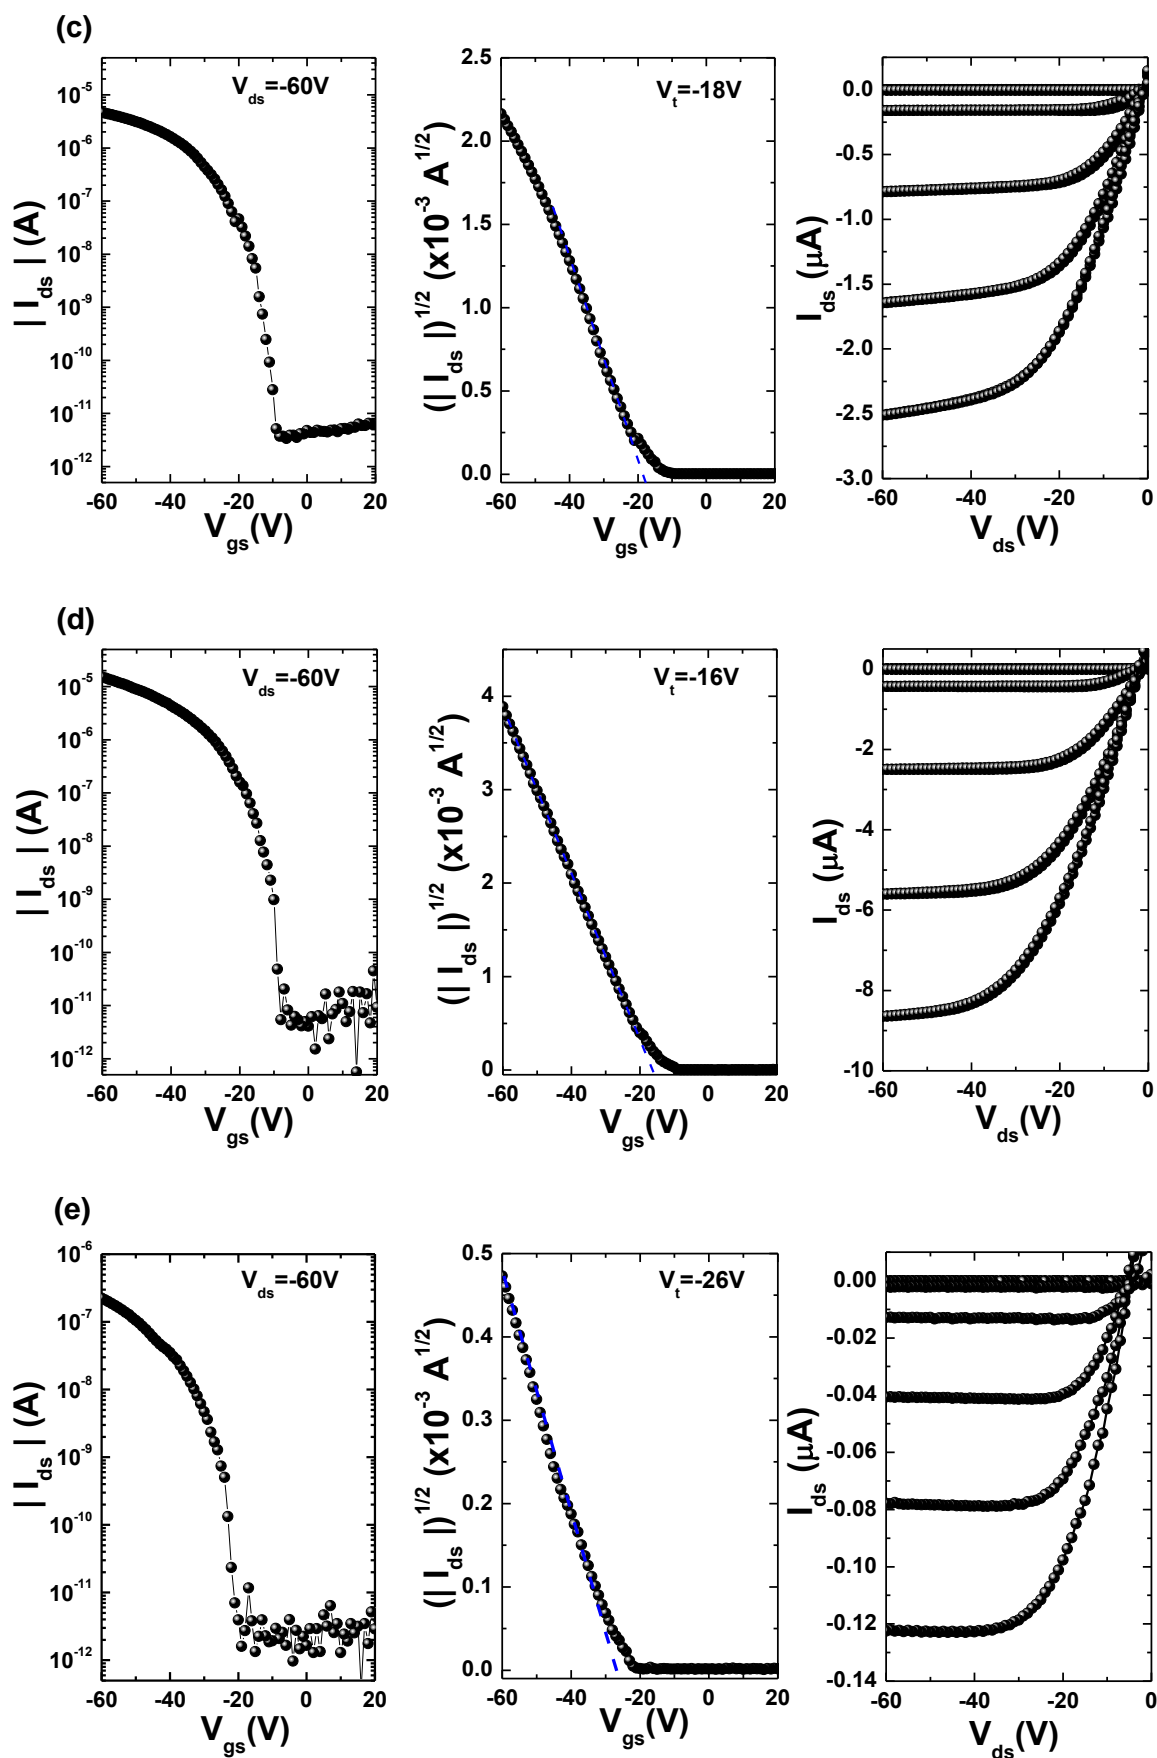

**Table S2** Field-effect charge transport properties of isoindigo donor-acceptor-donor (D-A-D) small molecules.  $V_{ds}$  is -60V.

| Active layer | $\mu_h(\text{cm}^2/(\text{V}\cdot\text{s}))$ | $I_{on}/I_{off}$  | $V_t$ (V) |
|--------------|----------------------------------------------|-------------------|-----------|
| IDED         | $3.2 \times 10^{-5}$                         | $4.5 \times 10^3$ | -20       |
| IDHT         | $1.1 \times 10^{-3}$                         | $5.7 \times 10^4$ | -21       |
| IDT          | $1.4 \times 10^{-2}$                         | $1.3 \times 10^6$ | -18       |
| ID2T         | $3.6 \times 10^{-2}$                         | $3.4 \times 10^6$ | -16       |
| ID3T         | $9.7 \times 10^{-4}$                         | $1.0 \times 10^5$ | -26       |



**Fig. S6** Transfer curves of OTFTs based on the isoindigo donor-acceptor-donor (D-A-D) small molecules:PC<sub>70</sub>BM (70:30) film. (a) IDT (b) IDHT and IDED.

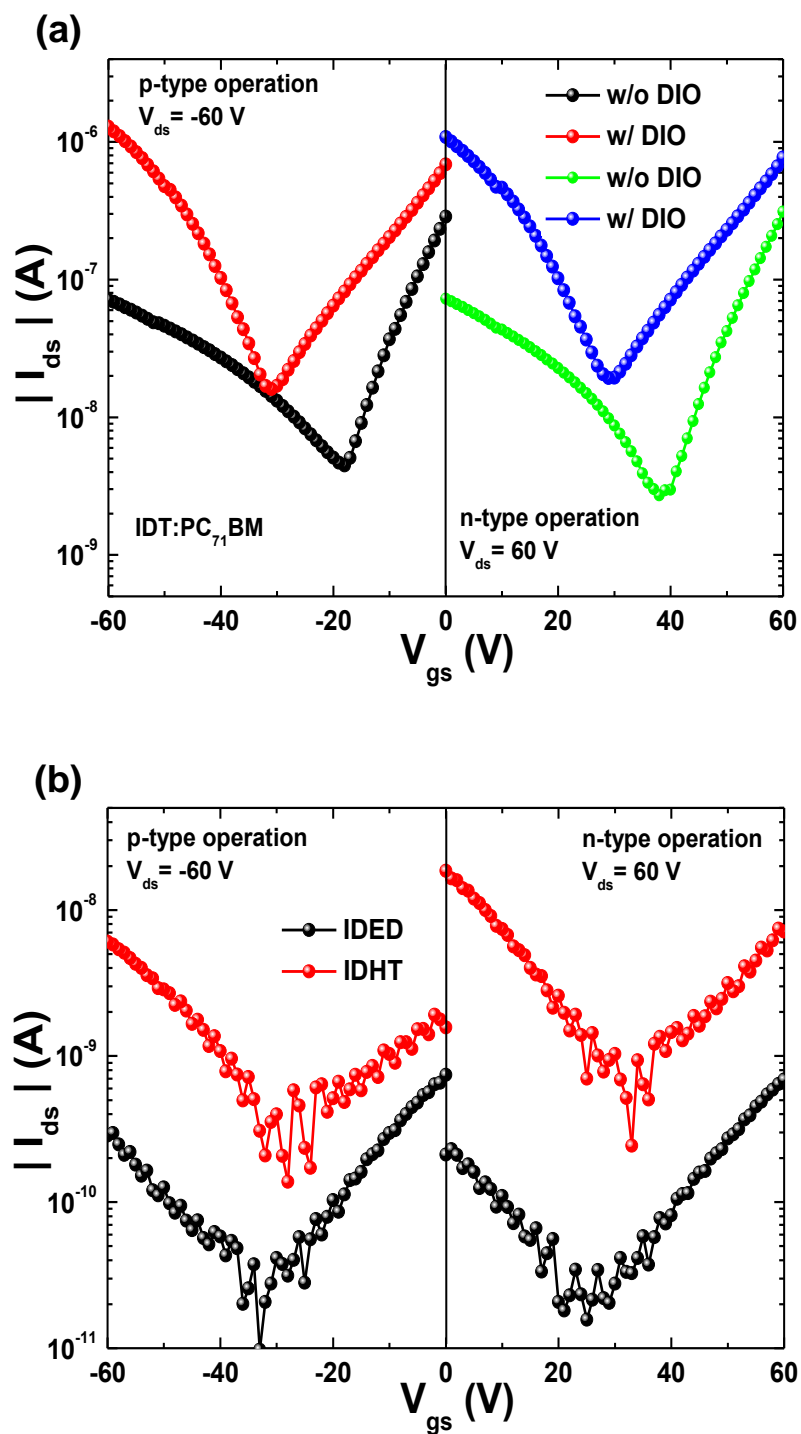

**Table S3** Field-effect charge transport properties of isoindigo donor-acceptor-donor (D-A-D) small molecules:PC<sub>70</sub>BM (70:30). V<sub>ds</sub> is ±60V.

| Active layer             | $\mu_e(\text{cm}^2/(\text{V}\cdot\text{s}))^a$ | $\mu_h(\text{cm}^2/(\text{V}\cdot\text{s}))^a$ | $\mu_e(\text{cm}^2/(\text{V}\cdot\text{s}))^b$ | $\mu_h(\text{cm}^2/(\text{V}\cdot\text{s}))^b$ |
|--------------------------|------------------------------------------------|------------------------------------------------|------------------------------------------------|------------------------------------------------|
| IDED:PC <sub>70</sub> BM | $4.62 \times 10^{-5}$                          | $2.09 \times 10^{-5}$                          | N/A <sup>c</sup>                               | N/A <sup>c</sup>                               |
| IDHT:PC <sub>70</sub> BM | $5.19 \times 10^{-5}$                          | $2.96 \times 10^{-5}$                          | N/A <sup>c</sup>                               | N/A <sup>c</sup>                               |
| IDT:PC <sub>70</sub> BM  | $6.15 \times 10^{-3}$                          | $1.37 \times 10^{-4}$                          | $7.80 \times 10^{-3}$                          | $8.76 \times 10^{-3}$                          |

<sup>a</sup>Electron and hole mobility of photo-active layer without DIO, <sup>b</sup>Electron and hole mobility of active photo-layer with 0.1% DIO, <sup>c</sup>Not available, there was no additive effect on the IDEE:PC<sub>70</sub>BM and IDHT:PC<sub>70</sub>BM films.

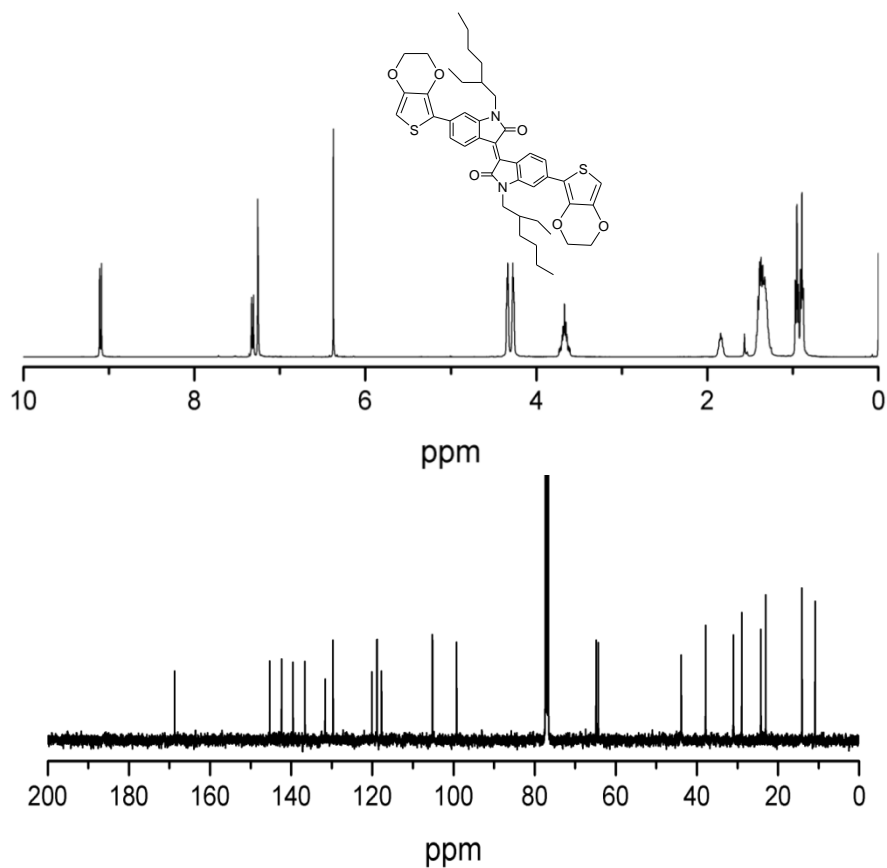

**Fig. S7**  $^1\text{H}$  and  $^{13}\text{C}$  NMR spectrum of 6, 6'-(2-ethylhexyl)-N,N'-bis(2-ethylhexyl)-6,6'-dihydrothieno[3,4-b][1,4]dioxin-2-ylisoindigo (IDED) in  $\text{CDCl}_3$ .

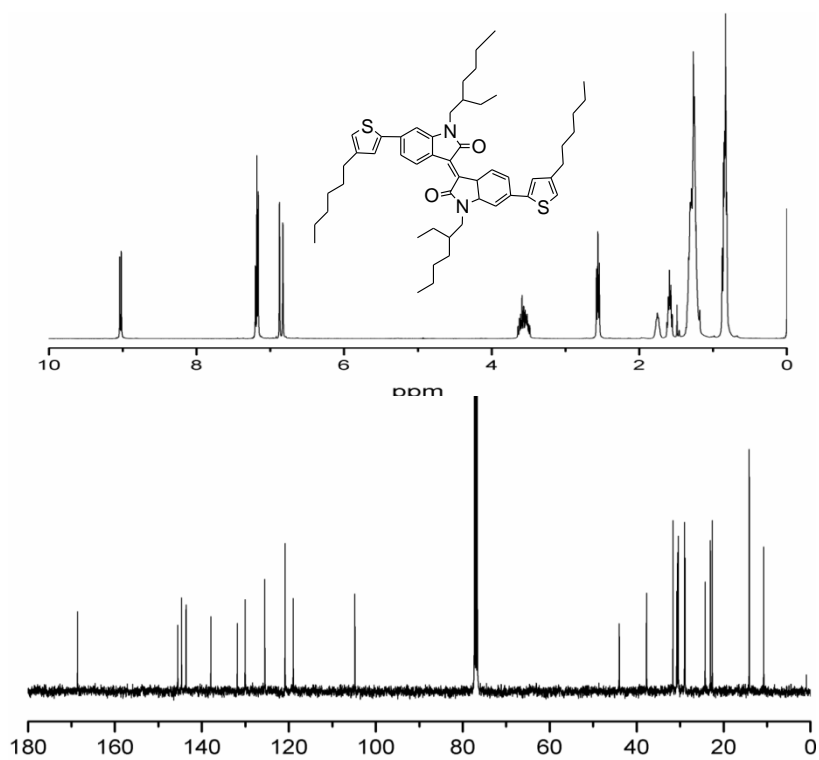

**Fig. S8**  $^1\text{H}$  and  $^{13}\text{C}$  NMR spectrum of 6,6'-dihexylthiophen-2-yl- $\text{N,N}'$ -(2-ethylhexyl)-isoindigo (IDHT) in  $\text{CDCl}_3$ .

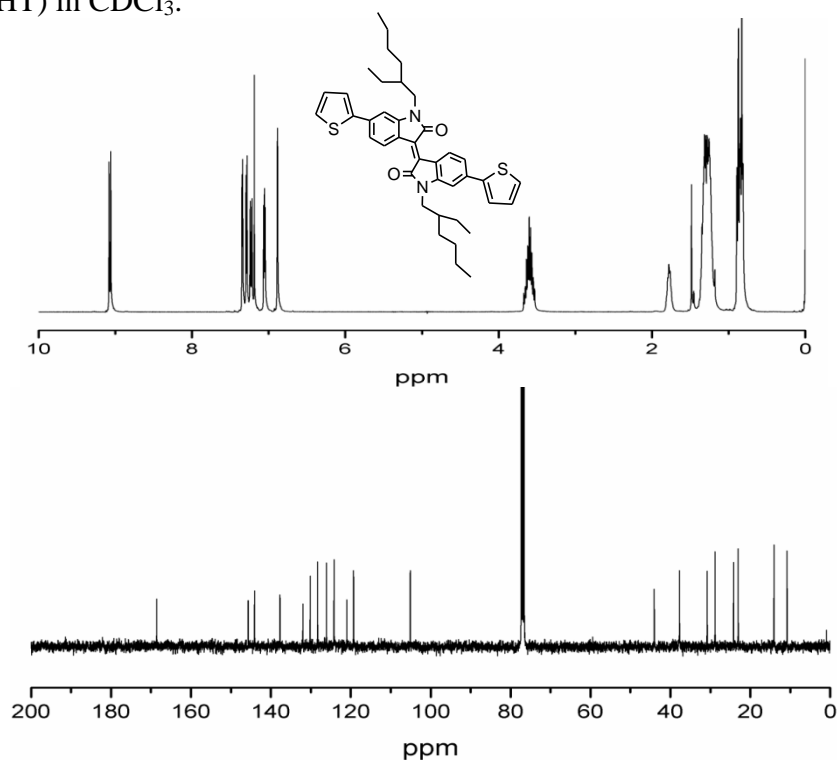

**Fig. S9**  $^1\text{H}$  and  $^{13}\text{C}$  NMR of spectrum of 6, 6'-thiophen-2-yl- $\text{N,N}'$ -(2-ethylhexyl)-isoindigo (IDT) in  $\text{CDCl}_3$ .

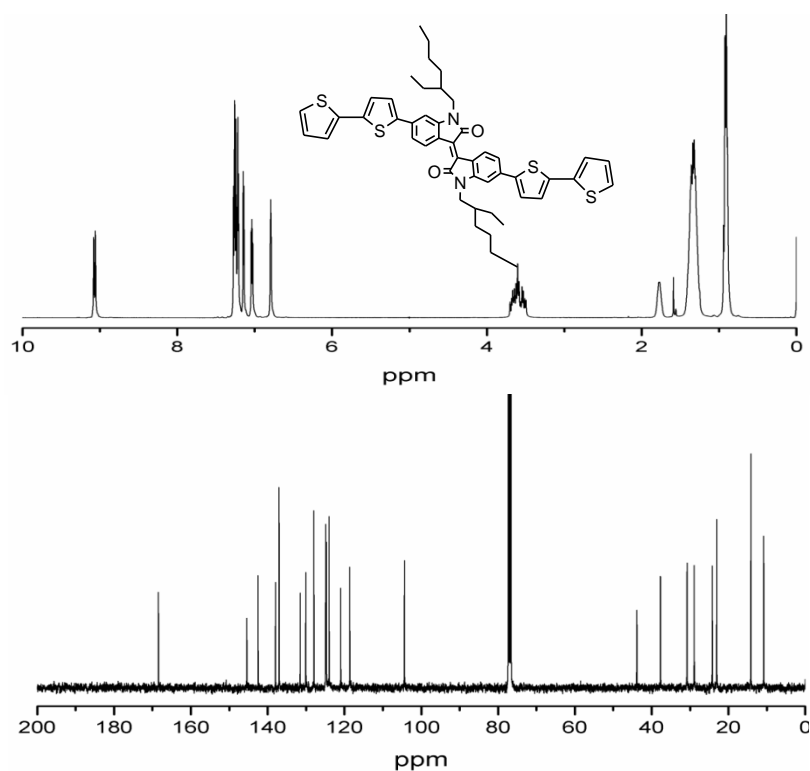

**Fig. S10**  $^1\text{H}$  and  $^{13}\text{C}$  NMR spectrum of 6, 6'-bithiophen-2-yl- $\text{N,N}'$ -(2-ethylhexyl)-isoindigo (ID2T) in  $\text{CDCl}_3$ .

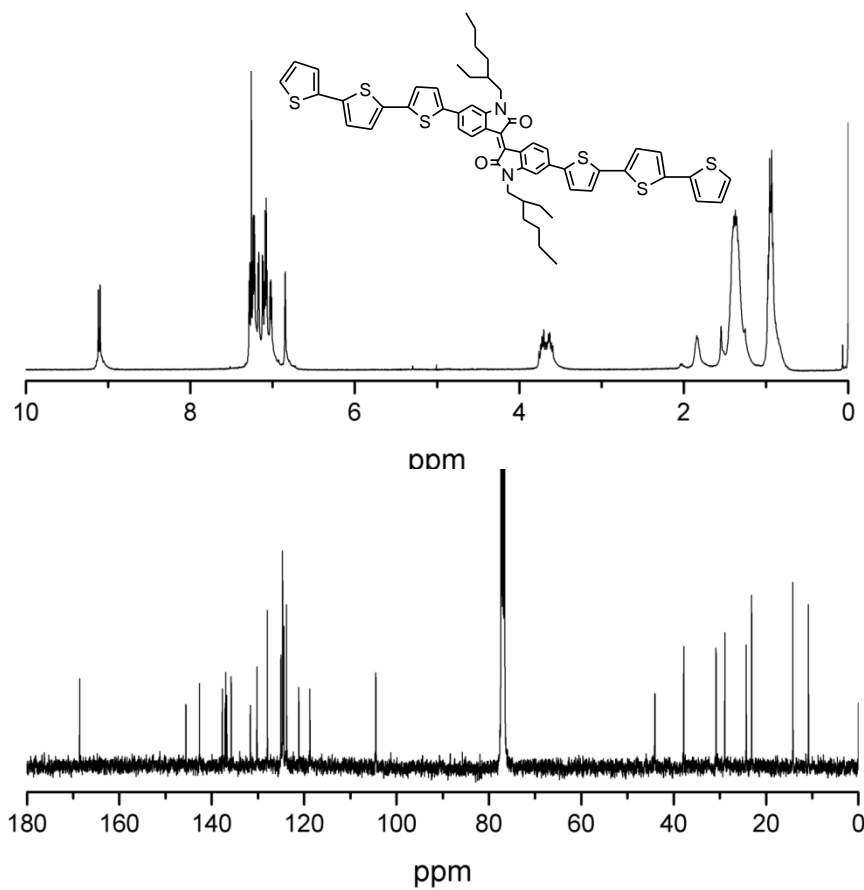

**Fig. S11**  $^1\text{H}$  and  $^{13}\text{C}$  NMR spectrum of 6,6'-terthiophen-2-yl-N,N'-(2-ethylhexyl)-isoindigo (ID3T) in  $\text{CDCl}_3$ .
